# Supplementary material
Source: PubMed Central journal article supplement (PMC8452149)
Supplement: NIHMS1706319-supplement-3.pdf [file NIHMS1706319-supplement-3.pdf]

**SUPPLEMENTAL INFORMATION**

**ATF3 Coordinates Serine And Nucleotide Metabolism To Drive Cell Cycle Progression In Acute Myeloid Leukemia**

**Daniela Di Marcantonio, Esteban Martinez, Joice S. Kanefsky, Jacklyn M. Huhn, Rashid Gabbasov, Anushk Gupta, John J. Kraus, Suraj Peri, YinFei Tan, Tomasz Skorski, Adrienne Dorrance, Ramiro Garzon, Aaron R. Goldman, Hsin-Yao Tang, Neil Johnson, and Stephen M. Sykes**

# Figure S1

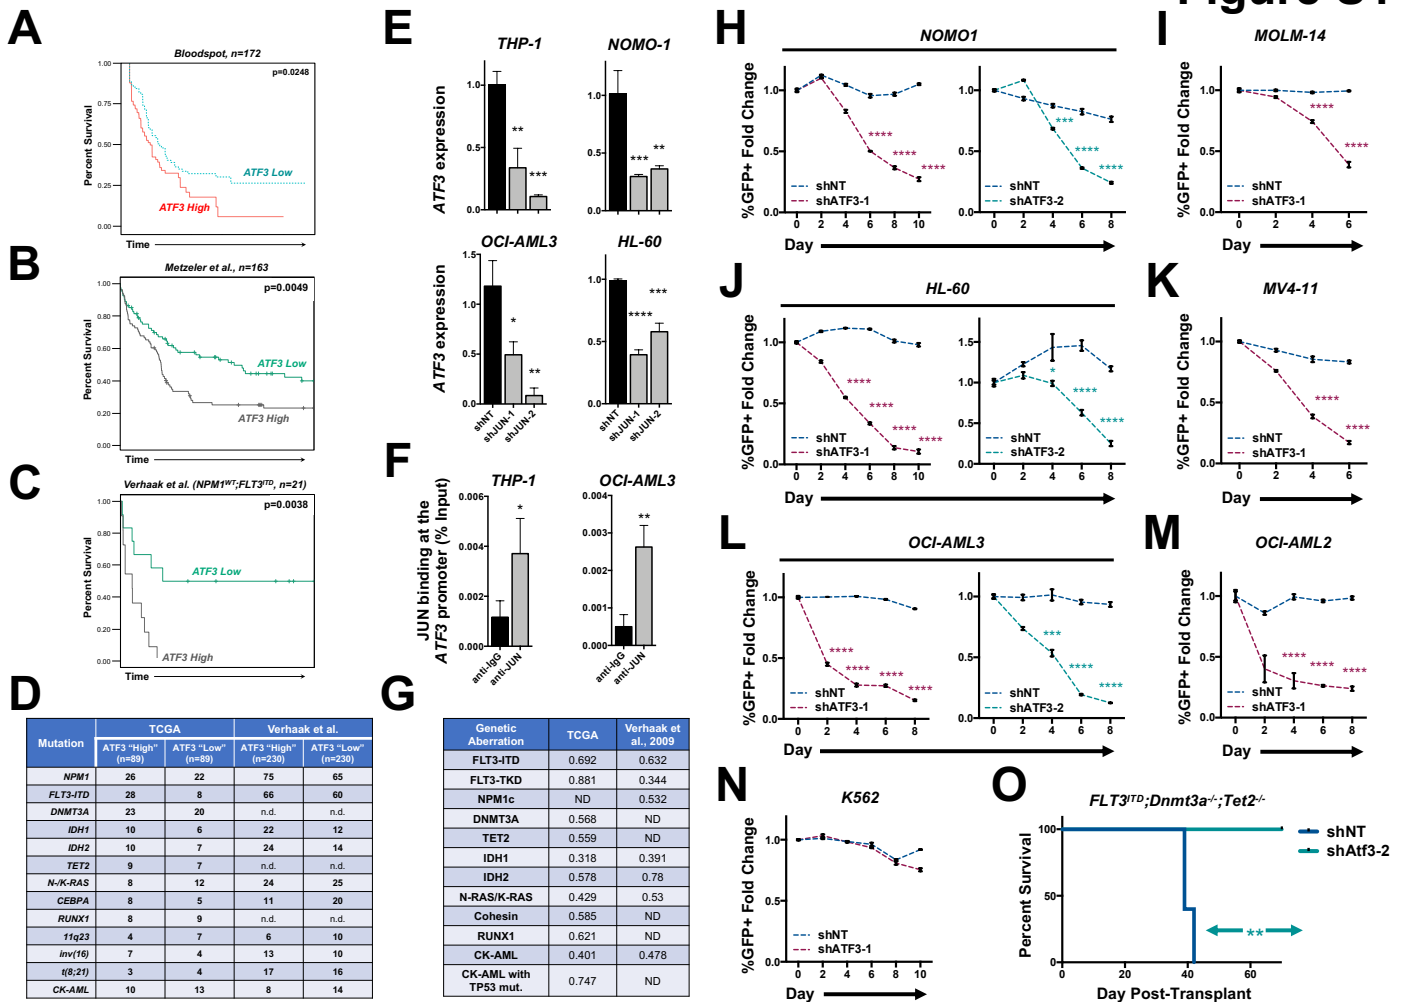

**Figure S1 related to Figure 1.** (A-C) Kaplan-Meier survival of AML patients divided by low vs high *ATF3* expression from the AML-TCGA dataset (A), from the German AMLCG 1999 dataset (Metzeler et al., 2008) (B) or from Verhaak et al., 2009 – specifically those AMLs that are wild type for *NPM1* (*NPM1* wt) and carry a *FLT3*<sup>ITD</sup> (C). *ATF3* high represents patients expressing *ATF3* at levels higher than the median and *ATF3* low represents patients with *ATF3* expression below the median. (D) Table enumerating the number of indicated mutations in high versus low *ATF3* expressers from the TCGA and Verhaak et al. gene expression datasets. (E) qPCR analysis of *JUN* and *ATF3* expression in shNT-, shJUN-1- and shJUN-2-expressing THP-1 (top, left panel), NOMO-1 (top, right panel), OCI-AML3 (bottom, left panel), and HL-60 (bottom, right panel) cells. Data represent the mean ± SD of three technical replicates. (F) qPCR quantification of *JUN* binding at the *ATF3* promoter from anti-IgG and anti-*JUN* ChIP analyses in THP-1 (top panel) and OCI-AML3 (bottom panel) cells. Data are presented as the % of input and represent the mean ± SD of three technical replicates. (G) Table enumerating the Spearman correlation coefficients of *JUN* and *ATF3* expression in the indicated mutations from the TCGA and Verhaak et al. gene expression datasets. (H) NOMO-1, (I) MV4-11, (J) HL-60, (K) MOLM-14, (L) OCI-AML3, (M) OCI-AML2, and (N) K562 expressing control- (shNT) or *ATF3*-targeting (shATF3-1 or -2) were assessed for an *in vitro* competitive growth assay as assessed in Figure 1A. (O) Kaplan-Meier survival curve analysis of mice transplanted with mouse *FLT3*<sup>ITD</sup>;Dnmt3a<sup>-/-</sup>; Tet2<sup>-/-</sup> leukemia cells expressing either shNT or shAtf3-2 (Log-rank (mantel-cox) test; n=5). Asterisk key = \*P ≤ 0.05; \*\*P ≤ 0.01; \*\*\*P ≤ 0.001; \*\*\*\*P ≤ 0.0001.

## Figure S2

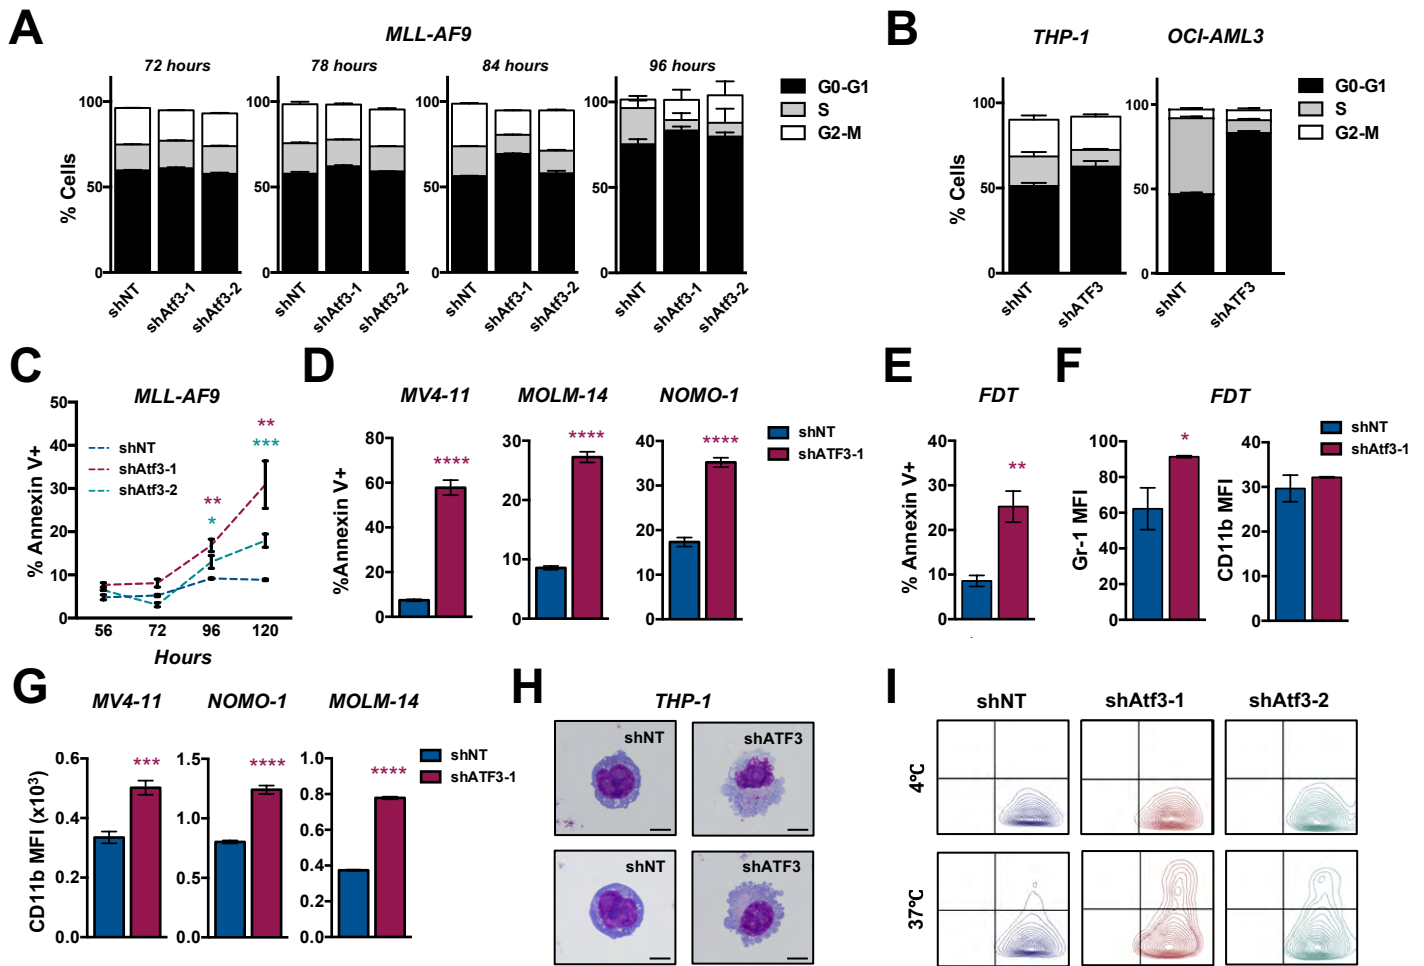

**Figure S2 related to Figure 2.** (A) *MLL-AF9* cells expressing shNT, shAtf3-1 or shAtf3-2 were sorted at 72-, 78-, 84- and 96-hours post-transduction and then fixed and stained with PI and then analyzed by flow cytometry. Data represent the mean  $\pm$  SD of three technical replicates. (B) *THP-1* and *OCI-AML3* infected with lentiviruses expressing shNT or shATF3-1 were sorted and stained with PI and then analyzed by flow cytometry. Data represent the mean  $\pm$  SD of three technical replicates. (C) *MLL-AF9* cells expressing shNT, shAtf3-1 or shAtf3-2 were analyzed by flow cytometry for the percentage of cells positive for Annexin-V staining (% Annexin-V+) at the indicated times post-transduction. (D) Flow cytometric analysis of the %Annexin V+ cells in *MV4-11*, *MOLM-14* and *NOMO-1* expressing shNT or shATF3-1 at 8-days post-transduction. Data represent the mean  $\pm$  SD of three technical replicates. (E & F) *FLT3<sup>ITD</sup>; Dnmt3a<sup>-/-</sup>; Tet2<sup>-/-</sup>* (*FDT*) cells were transduced with shNT or shAtf3-1 and analyzed by flow cytometry for the %Annexin V+ cells (E) and Gr1 and CD11b MFI (F). Data represent the mean  $\pm$  SD of three technical replicates. (G) *MV4-11*, *NOMO-1* and *MOLM-14* expressing shNT or shATF3-1 were analyzed for CD11b MFI by flow cytometry. Data represent the mean  $\pm$  SD of three technical replicates. (H) Wright-Giemsa staining of *THP-1* cells infected with shNT or shATF3-1 and analyzed 7 days after infection (100X magnification - bar = 200 $\mu$ m). (I) Contour plot analysis showing the gating strategy for the phagocytosis assay shown in figure 2F. Asterisk key = \* $P \leq 0.05$ ; \*\* $P \leq 0.01$ ; \*\*\* $P \leq 0.001$ ; \*\*\*\* $P \leq 0.0001$ .

Figure S3

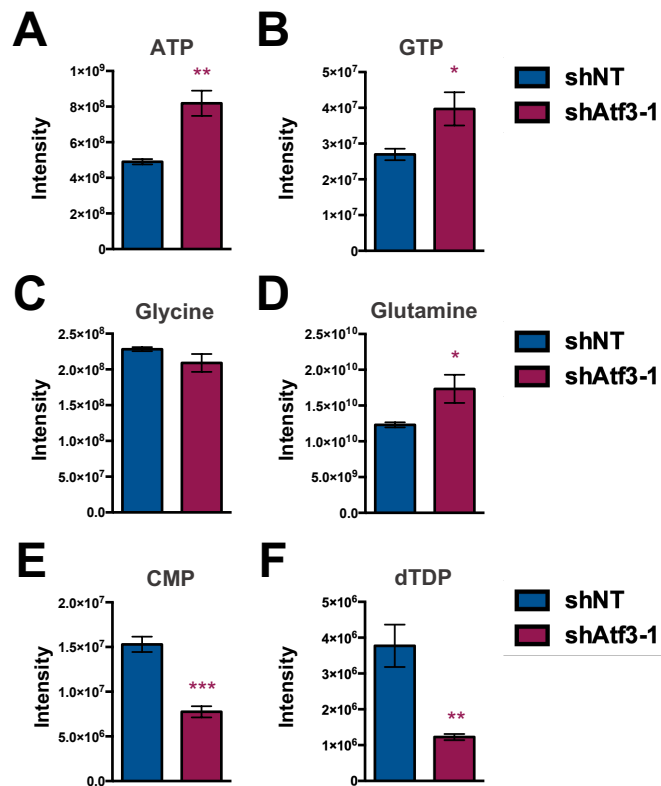

**Figure S3 related to Figure 4.** (A-F) Steady-state levels of various purine synthesis pathway metabolites extracted from shNT- or shAtf3-1-expressing MLL-AF9 at 72-hours post-transduction: (A) ATP, (B) GTP, (C) Glycine, (D) Glutamine, (E) CMP, (F) dTDP.

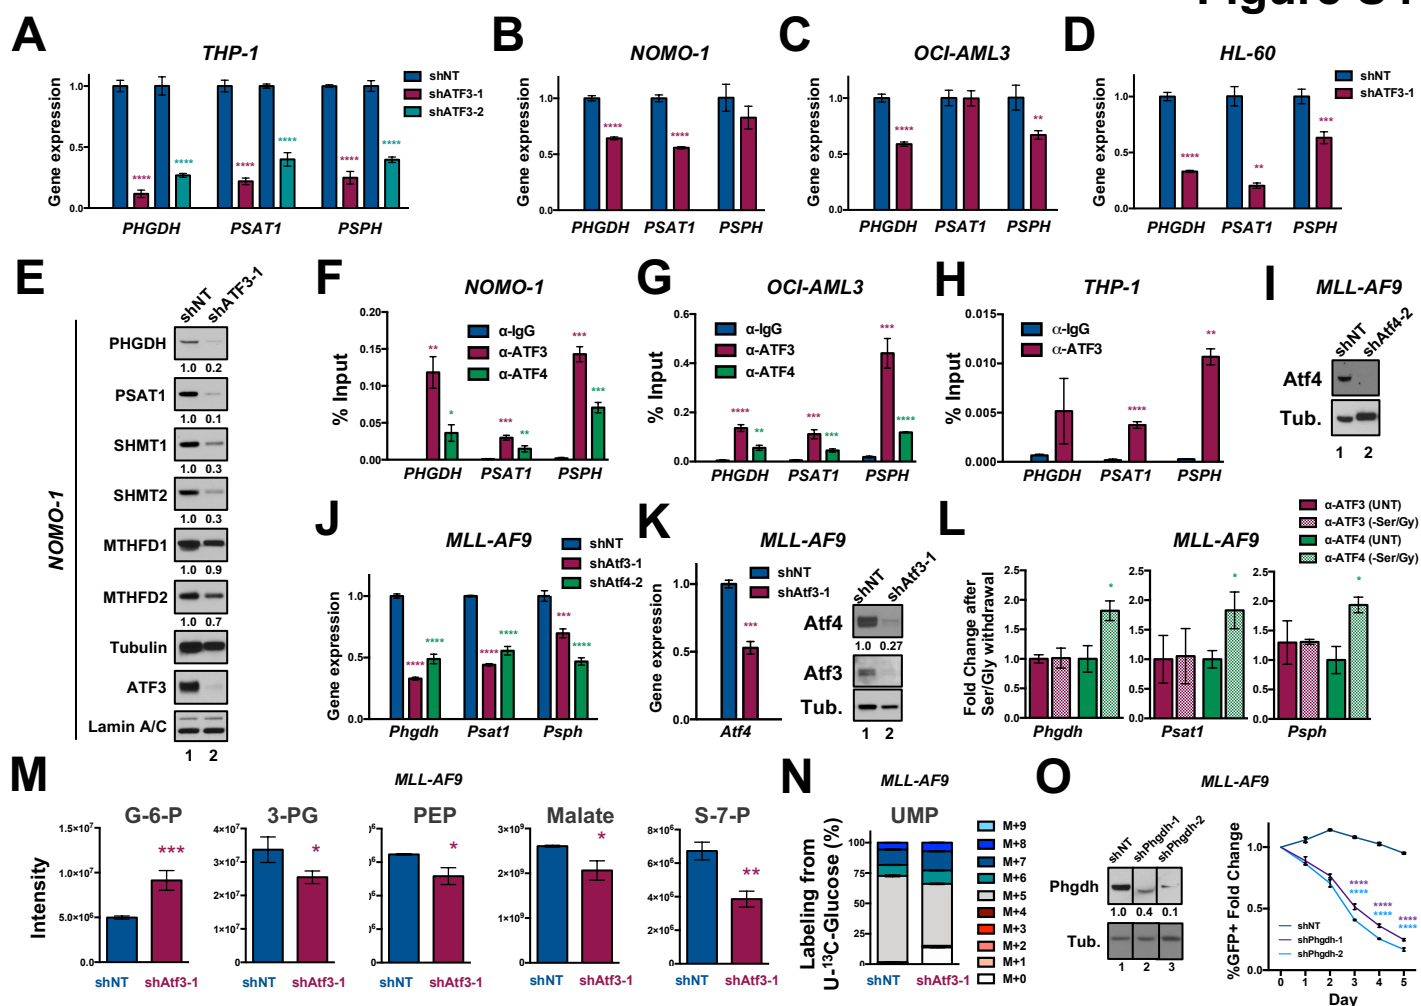

**Figure S4 related to Figure 5.** (A-D) qPCR analysis of steady-state levels of *PHGDH*, *PSAT1* and *PSPH* mRNA in *THP-1* (A), *NOMO-1* (B), *OCI-AML3* (C) and *HL-60* (D) cells expressing the indicated shRNAs. Data represent the mean ± SD of three technical replicates. (E) Western blot analysis of FACS-sorted GFP<sup>+</sup> *NOMO-1* cells expressing shNT or shATF3 at 96-hours post-transduction with the indicated antibodies. Proteins levels were quantified and normalized to tubulin expression. (F & G) qPCR quantification of ATF3 and ATF4 binding at *PHGDH*, *PSAT1* and *PSPH* promoters from anti-IgG, -ATF3 or -ATF4 ChIP analyses in *NOMO-1* (F) and *OCI-AML3* (G). The approximate promoter regions are: *PHGDH* (0 - +1000); *PSAT1* (-500 - +500); *PSPH* (+9000 - +10000). Data are presented as the % of input and represent the mean ± SD of three technical replicates. (H) qPCR quantification of ATF3 binding at *PHGDH*, *PSAT1* and *PSPH* promoters from anti-IgG or -ATF3 ChIP analyses in *THP-1* cells. Data represent the mean ± SD of three technical replicates. (I) Western blot analysis of FACS-sorted GFP<sup>+</sup> *MLL-AF9* leukemia cells expressing shNT or shAtf4-2 at 48-hours post-transduction with the indicated antibodies. (J) qPCR analysis of *Phgdh*, *Psat1* and *Psph* in shNT-, shAtf3-1- and shAtf4-2-expressing *MLL-AF9* cells at 48 hours post-transduction. Data represent the mean ± SD of three technical replicates. (K) shNT- and shAtf3-1-expressing *MLL-AF9* cells were assessed for Atf4 mRNA expression and 48-hours post-transduction (left panel) and Atf4 protein levels and 72-hours post-transduction (right panel). mRNA data represent the mean ± SD of three technical replicates. (L) qPCR quantification of anti-ATF3 or -ATF4 ChIP samples from *MLL-AF9* cells cultured in serine/glycine-deficient or regular media with primers amplifying regions of the *Phgdh*, *Psat1*, and *Psph* genes. Data are presented as the fold change of ATF3 or ATF4 binding in *MLL-AF9* cells cultured in serine/glycine-deficient divided regular media and represent the mean ± SD of three technical replicates. (M) Steady-state levels of various purine synthesis pathway metabolites extracted from shNT- or shAtf3-1-expressing *MLL-AF9* at 72-hours post-transduction: Glucose-6-phosphate (G-6-P), 3-phosphoglycerate (3-PG), phosphoenolpyruvate (PEP), Malate, or sedoheptulose-7-phosphate (S-7-P). (N) shNT

or shAtf3-1-expressing MLL-AF9 at 48 hours post-transduction were cultured for 24 hours with U-<sup>13</sup>C-glucose and metabolites were subsequently extracted and analyzed by LC-MS/MS. Isotopologue distribution (%) of the total steady-state levels of UMP. **(O)** *Left panel*, western blot analysis of MLL-AF9 cells expressing control shRNA (shNT) or mouse Phgdh targeting (shPhgdh-1 and -2) shRNAs. This image is a composite of three objects taken from the same western blot micrograph. The three separate micrograph divisions are demarcated by black lines. *Right panel*, *in vitro* competitive growth curve of MLL-AF9 cells expressing shNT, shPhgdh-1 or shPhgdh-2. Percentage of GFP-positive (%GFP+) cells were evaluated at the indicated time points by flow cytometry and plotted as the fold change in %GFP+ compared to the %GFP+ at day 2 post-transduction (day 0 in the figure). Data represent the mean  $\pm$  SD of three technical replicates. Asterisk key = \*P  $\leq$  0.05; \*\*P  $\leq$  0.01; \*\*\*P  $\leq$  0.001; \*\*\*\*P  $\leq$  0.0001.

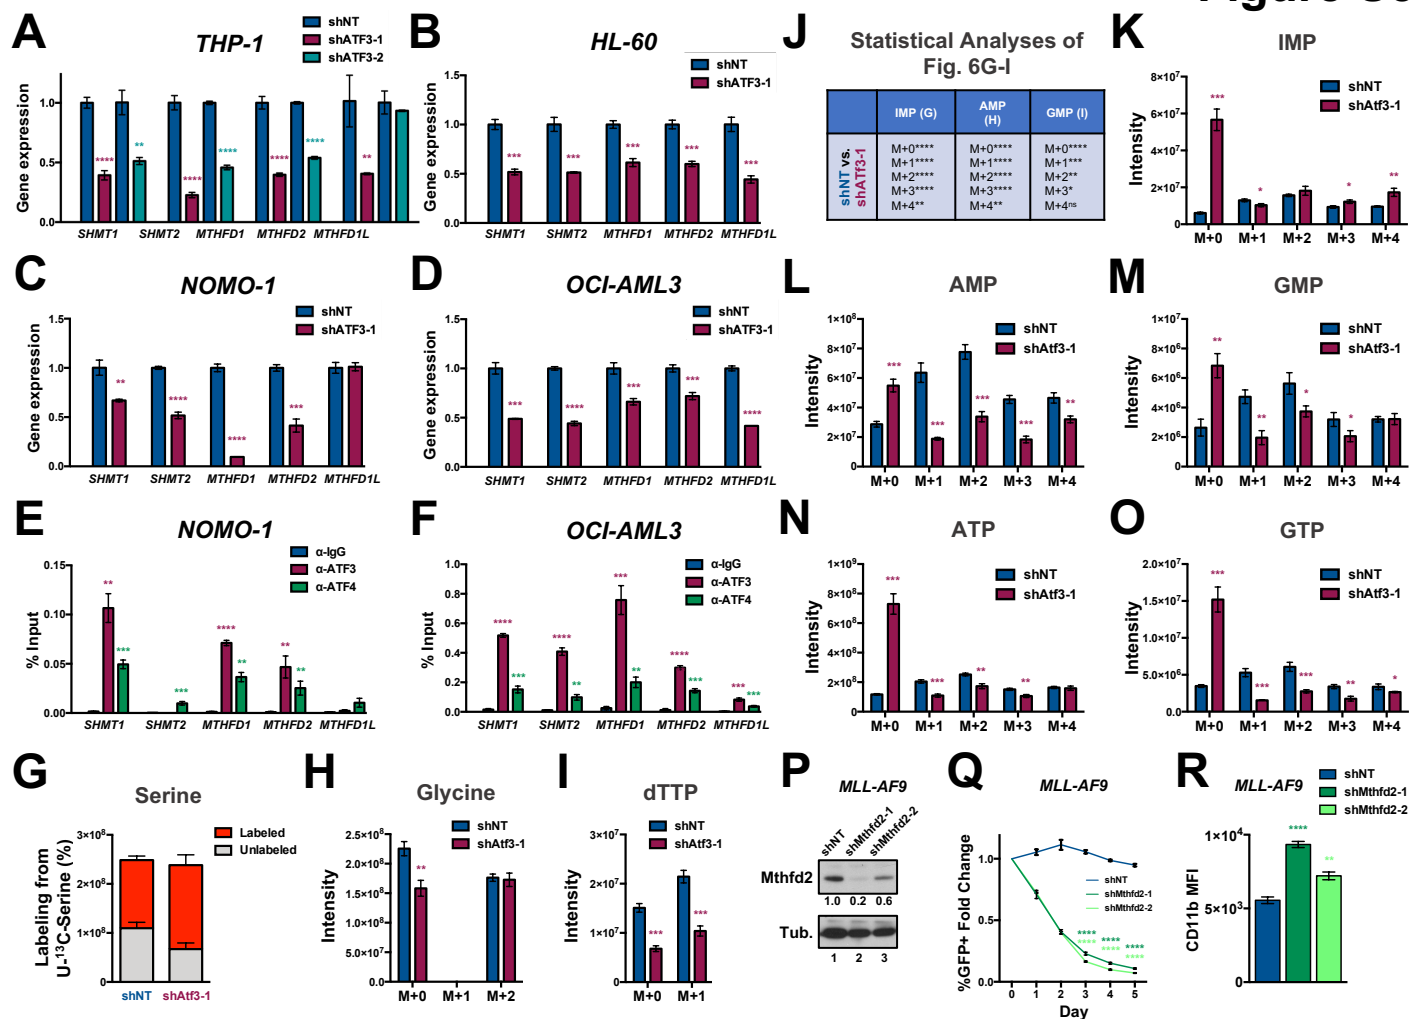

**Figure S5 related to Figure 6.** (A-D) qPCR analysis of one-carbon metabolism enzymes of THP1 (A), HL-60 (B), NOMO-1 (C) and OCI-AML3 (D) cells expressing the indicated shRNAs. Data are represented as mean  $\pm$  SD of three replicates. (E & F) qPCR quantification of ATF3 and ATF4 binding at *SHMT1*, *SHMT2*, *MTHFD1*, *MTHFD2* and *MTHFD1L* promoters from anti-IgG, -ATF3 or -ATF4 ChIP analyses in NOMO-1 (E) and OCI-AML3 (F). The approximate promoter regions are: *SHMT1* (+500 - +1500); *SHMT2* (0 - +1000); *MTHFD1* (-500 - +500); *MTHFD2* (-500 - +500); *MTHFD1L* (0 - +1000). Data are presented as the % of input and represent the mean  $\pm$  SD of three technical replicates. From the experiment presented in Figure 6: (G) Quantification and statistical analysis of the total steady-state levels of serine levels (bar magnitudes) in shNT and shAtf3-1-expressing MLL-AF9 cells. The unlabeled fraction (grey) represents the total steady-state levels of M+0 metabolites and the labeled fractions (red) represent the total steady-state levels of combined isotopologues (the sum of M+1, M+2 and M+3). (H) Steady-state levels of unlabeled (M+0) and labeled (M+2) glycine. (I) Steady-state levels of unlabeled (M+0) and labeled (M+1) dTTP. (J) Table summarizing the statistical analyses of the data presented in Figure 6G-I. (K-O) Steady-state levels of unlabeled (M+0) and labeled (M+1, M+2, M+3, M+4) isotopologues of: IMP (K), AMP (L), GMP (M), ATP (N) and GTP (O). (P) Western blot analysis of MLL-AF9 cells expressing control shRNA (shNT) or mouse *Mthfd2* targeting (shMthfd2-1 and -2) shRNAs with the indicated antibodies. (Q) *In vitro* competitive growth curve of MLL-AF9 cells expressing shNT, shMthfd2-1 or shMthfd2-2. Percentage of GFP-positive (%GFP+) cells were evaluated at the indicated time points by flow cytometry and plotted as the fold change in %GFP+ compared to the %GFP+ at day 2 post-transduction (day 0 in the figure). (R) MLL-AF9 cells expressing shNT, shMthfd2-1 or shMthfd2-2 were analyzed by flow cytometry for CD11b expression (MFI). Data represent the mean  $\pm$  SD of three technical replicates. Asterisk key = \* $P \leq 0.05$ ; \*\* $P \leq 0.01$ ; \*\*\* $P \leq 0.001$ ; \*\*\*\* $P \leq 0.0001$ .

# Figure S6

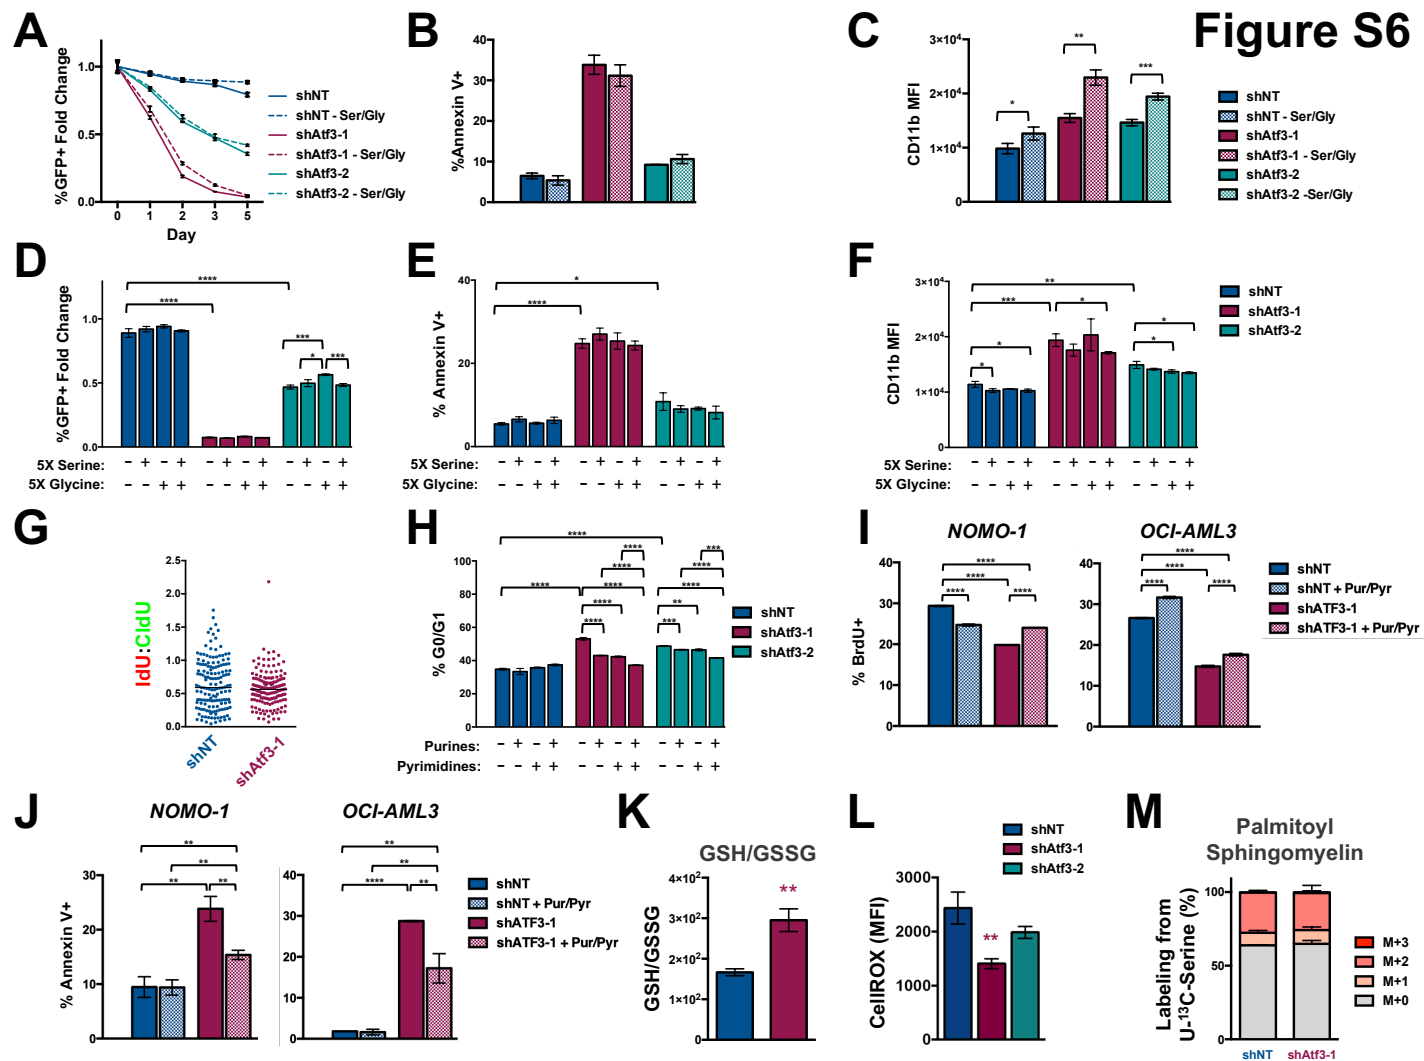

**Figure S6 related to Figure 7.** (A) MLL-AF9 cells expressing shNT, shAtf3-1 or shAtf3-2 were cultured in either regular media of serine/glycine-deficient and then assessed for changes in % GFP+ by flow cytometry at the indicated time points. Data is presented as the fold change in %GFP+ compared to the %GFP+ at day 2 post-transduction (day 0 in the figure) and represent the mean  $\pm$  SD of three technical replicates. (B & C) MLL-AF9 cells expressing shNT, shAtf3-1 or shAtf3-2 were cultured in either regular media of serine/glycine-deficient and then assessed by flow cytometry for: %Annexin-V+ at 5 days post-transduction (B) or CD11b at 4 days post-transduction (C). Data represent the mean  $\pm$  SD of three technical replicates. (D-F) MLL-AF9 cells expressing shNT, shAtf3-1 or shAtf3-2 were cultured in either regular media, media supplemented with 5X serine, 5X glycine or 5X serine + 5X glycine and then assessed by flow cytometry for: Fold change %GFP+ at 5 days post-transduction, (D) %Annexin-V+ at 5 days post-transduction (E) or CD11b at 4 days post-transduction (F). Data represent the mean  $\pm$  SD of three technical replicates. (G) Analysis of DNA fiber lengths presented as the IdU/CldU length ratio, black bar indicates median values. (H) Quantification of percentage of cells in G0/G1 (%G0/G1) from data present in Figure 7D and E. Data represent the mean  $\pm$  SD of three technical replicates. (I and J) NOMO1 and OCI-AML3 cells expressing control or ATF3-targeting shRNAs (shATF3-1) were cultured with vehicle of 12.5  $\mu$ M of each 2'-deoxyadenosine and 2'-deoxyguanosine, 2'-deoxycytosine and 2'-deoxyuridine 5'-monophosphate and then assessed for: (I) %BrdU (NOMO-1, left panel and OCI-AML3, right panel) or (J) %Annexin V+ (NOMO-1, left panel and OCI-AML3, right panel). (K) Ratio of reduced-to-oxidized (GSH/GSSG) steady-state levels of glutathione in shNT- or shAtf3-1-expressing MLL-AF9. (L) MLL-AF9 cells expressing NT, Atf3-1 or Atf3-2 shRNAs were stained with CellROX Deep Red and analyzed by flow cytometry at 4 days post-transduction. Left, the average MFI of CellROX staining in live cells; right, representative histogram plot of a single experiment. (M) Isotopologue distribution (%) of the total steady-state levels of



Palmitoyl Sphingomyelin in shNT- or shAtf3-1-expressing MLL-AF9. Asterisk key = \*P ≤ 0.05; \*\*P ≤ 0.01; \*\*\*P ≤ 0.001; \*\*\*\*P ≤ 0.0001.

**Table S1**

| TUHS #        | Accession # | NPM1        | FLT3-ITD | ASXL1   | RUNX1                  | TET2                  | DNMT3A | IDH1  |
|---------------|-------------|-------------|----------|---------|------------------------|-----------------------|--------|-------|
| TUHS-AML-002  | U-12-0954   | wt          | ITD      | wt      | A343AG<br>or<br>A370AG | wt                    | wt     | R132H |
| TUHS-AML-0014 | U-17-0754   | W288s<br>fs | wt       | N986S   | wt                     | Q461*;<br>K1321<br>fs | wt     | wt    |
| TUHS-AML-0015 | U-17-2361   | W288s<br>fs | ITD      | G646 fs | wt                     | Q743*                 | R882H  | wt    |

\*fs = frame shift

**Table S1 related to Figure 1.** Annotation of mutations found in the patient samples presented in Figure 1E.

**Table S2**

| <b>qPCR Primers</b> |         |                           |
|---------------------|---------|---------------------------|
| <b>Gene</b>         |         | <b>Sequence (5' → 3')</b> |
| Phgdh               | Forward | ATGGCCTTCGCAAATCTGC       |
|                     | Reverse | AGTTCAGCTATCAGCTCCTCC     |
| Psat1               | Forward | CAGTGGAGCGCCAGAATAGAA     |
|                     | Reverse | CCTGTGCCCTTCAAGGAG        |
| PspH                | Forward | AGGAAGCTCTTCTGTTCAGCG     |
|                     | Reverse | GAGCCTCTGGACTTGATCCC      |
| Shmt1               | Forward | CAGGGCTCTGTCTGATGCAC      |
|                     | Reverse | CGTAACGCGCTCTTGTCAC       |
| Shmt2               | Forward | TGGCAAGAGATACTACGGAGG     |
|                     | Reverse | GCAGGTCCAACCCCATGAT       |
| Mthfd1              | Forward | GGGAATCCTGAACGGGAAACT     |
|                     | Reverse | TGAGTGGCTTTGATCCCAATC     |
| Mthfd2              | Forward | AGTGCGAAATGAAGCCGTTG      |
|                     | Reverse | GACTGGCGGGATTGTCACC       |
| Mthfd11             | Forward | GCATGGCCTTACCCTTCAGAT     |
|                     | Reverse | GTACGAGCTTCCCCAGATTGA     |
| <b>ChIP Primers</b> |         |                           |
| <b>Gene</b>         |         | <b>Sequence (5' → 3')</b> |
| Phgdh               | Forward | TGGGCAGGGTTCTCGATCTC      |
|                     | Reverse | AATCAAAAGGAGACTGTTGGCG    |
| Psat1               | Forward | CTTCCATGGTGCTAAGGCGA      |
|                     | Reverse | GACTCCGATAGTGAGCGTGG      |
| PspH                | Forward | CAGAGAGGAGATAGCCGTGG      |
|                     | Reverse | ACAGGTACCGGAACCGAGAA      |
| Shmt1               | Forward | GGATCACAGTAGTGCATCCCC     |
|                     | Reverse | TGGACTGACTTTACCCCTAGGAA   |
| Shmt2               | Forward | GTTCTTACCCGAGTGGTCCG      |
|                     | Reverse | AGAGCAGCTGGTTTTCGACC      |
| Mthfd1              | Forward | GGAGAAGCCAGTACGATCCA      |
|                     | Reverse | CTGAGCAAGTTTGCGTGACC      |
| Mthfd11             | Forward | AGATACTGCTGCACCGGAAC      |
|                     | Reverse | TAGGTCTAGGCGTACGGTCC      |

**Table S2 related to STAR methods.** List of the qPCR and ChIP primers used through the study to recognize the indicated mouse gene targets.

Table S3

| qPCR Primers |         |                         |
|--------------|---------|-------------------------|
| Gene         |         | Sequence (5' → 3')      |
| PHGDH        | Forward | CTGCGGAAAGTGCTCATCAGT   |
|              | Reverse | TGGCAGAGCGAACAATAAGGC   |
| PSAT1        | Forward | TGCCGCACTCAGTGTGTTAG    |
|              | Reverse | GCAATTCCCGCACAAAGATTCT  |
| PSPH         | Forward | GAGGACGCGGTGTCAGAAAT    |
|              | Reverse | GGTTGCTCTGCTATGAGTCTCT  |
| SHMT1        | Forward | CTGGCACAACCCCTCAAAGA    |
|              | Reverse | AGGCAATCAGCTCCAATCCAA   |
| SHMT2        | Forward | CCTTTCTGCAACCTCACGAC    |
|              | Reverse | TGAGCTTATAGGGCATAGACTCG |
| MTHFD1       | Forward | GCGCCAGCAGAAATCCTGA     |
|              | Reverse | AGGTAAGTGTCTCCTTCAACTGA |
| MTHFD2       | Forward | AGGACGAATGTGTTTGGATCAG  |
|              | Reverse | GGAATGCCAGTTCGCTTGATTA  |
| MTHFD1L      | Forward | CTGCCTTCAAGCCGGTTCTT    |
|              | Reverse | TTTCCTGCATCAAGTTGTCGT   |
| R18S         | Forward | GCCCCTGTAATTGGAATGAGTC  |
|              | Reverse | CCAAGATCCAACACTACGAGCTT |
| ChIP Primers |         |                         |
| Gene         |         | Sequence (5' → 3')      |
| PHGDH        | Forward | TCTGATGCAAGACTGCTCCG    |
|              | Reverse | GTCTGGTCACTCCCAACCAG    |
| PSAT1        | Forward | AGGAGCAACTGCTTCGACTC    |
|              | Reverse | CCTGCGCTAATTGGTTTCGC    |
| PSPH         | Forward | GGGGATTGTTCCAATCTTGCAC  |
|              | Reverse | CCTGTTGCCAAACAGCATGA    |
| SHMT1        | Forward | GATTGAAGGCCCGCATCTGT    |
|              | Reverse | CTTGGCTTCGAGATTCCGGG    |
| SHMT2        | Forward | GAGTTTTTCGGCCTGGTCTCA   |
|              | Reverse | GGATCTGCCCCGAGAGTAAGC   |
| MTHFD1       | Forward | TGGTGCCAACTCATTAGGGG    |
|              | Reverse | TACTGGATCCCCCGTTCTCC    |
| MTHFD2       | Forward | TCTGATGCAAGACTGCTCCG    |
|              | Reverse | GTCTGGTCACTCCCAACCAG    |
| MTHFD1L      | Forward | AGGAGCAACTGCTTCGACTC-   |
|              | Reverse | CCTGCGCTAATTGGTTTCGC    |

**Table S3 related to STAR methods.** List of the qPCR and ChIP primers used through the study to recognize the indicated human gene targets.
